# Supplementary material
Source: publisher site journal article supplement (https://www.dovepress.com/get_supplementary_file.php?f=354549.docx)
Supplement: Supplementary file 1 [file get_supplementary_file.php]

**Supplementary figure 1. Knowledge, attitude, and practice level of DKD disease management of nurses**

Supplementary Figure 1 provides an overview of the knowledge, attitude, and practice levels regarding DKD management among nurses. In the bar graph, the blue bars represent the percentage of nurses with a 'good' level of knowledge, attitude, and practice, whereas the orange bars indicate those with a 'poor' level. The x-axis categorizes the three areas assessed—knowledge, attitude, and practice—while the y-axis shows the percentage of nurses falling into each category. This figure underscores the disparities between the nurses' knowledge, attitude, and implementation of DKD management, highlighting a particularly high level of good attitude but also indicating areas where knowledge and practice may require further improvement.

**Supplementary figure 2. Knowledge, attitude, and practice level of DKD disease management of doctors**

Supplementary Figure 2 showcases the knowledge, attitude, and practice levels in the management of DKD among doctors. The bar graph contrasts the proportion of doctors with a 'Good/positive' (dark blue) level against those with a 'Poor/negative' (orange) level across three domains: knowledge, attitude, and practice. The y-axis indicates the percentage of respondents, revealing that while a high percentage of doctors exhibit a positive attitude toward DKD management, the knowledge and practice levels have more room for improvement. This figure highlights the critical areas where further education and training may be beneficial to enhance the overall management of DKD by doctors.
